# Supplementary material
Source: PubMed Central journal article supplement (PMC4838028)

**Supplementary Figure 1.** Electronic cigarette model eGo-3 Twist (Volish Ltd., Poland) used to generate vapors in the study.

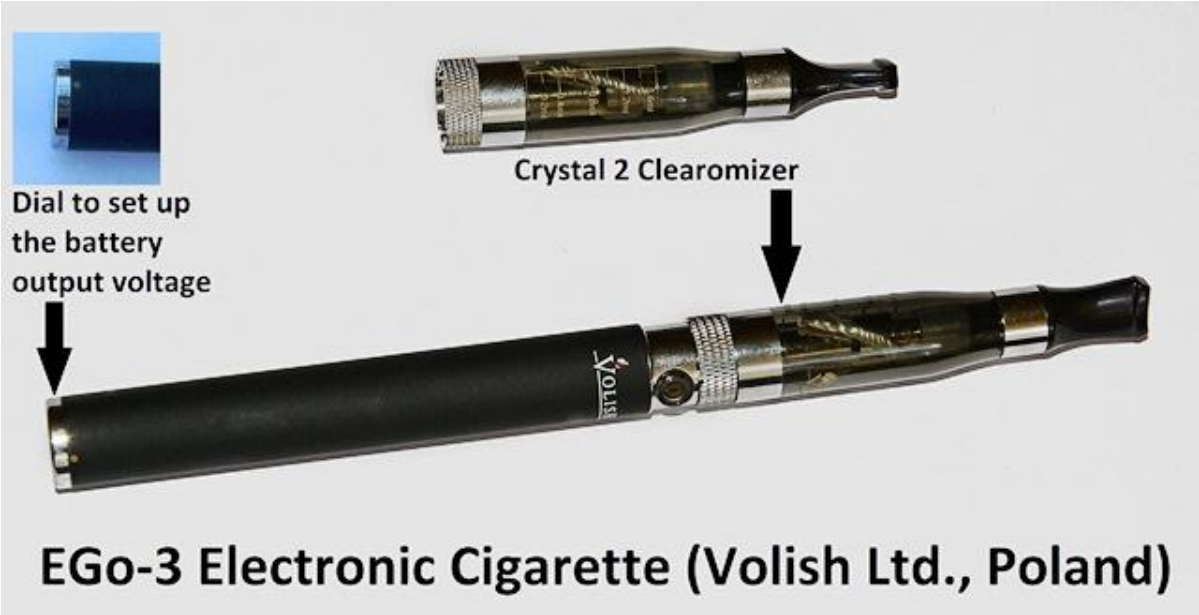

Supplement: supp_ntu078_Carbonyls_NTR_Suppl_Figure_1.pdf [file supp_ntu078_Carbonyls_NTR_Suppl_Figure_1.pdf]
